# Supplementary material
Source: PubMed Central journal article supplement (PMC8515086)
Supplement: mmc1.pdf [file mmc1.pdf]

**Figure S1.** Acute kidney injury stages over time according to the kidney disease improving global outcomes (KDIGO) classification.

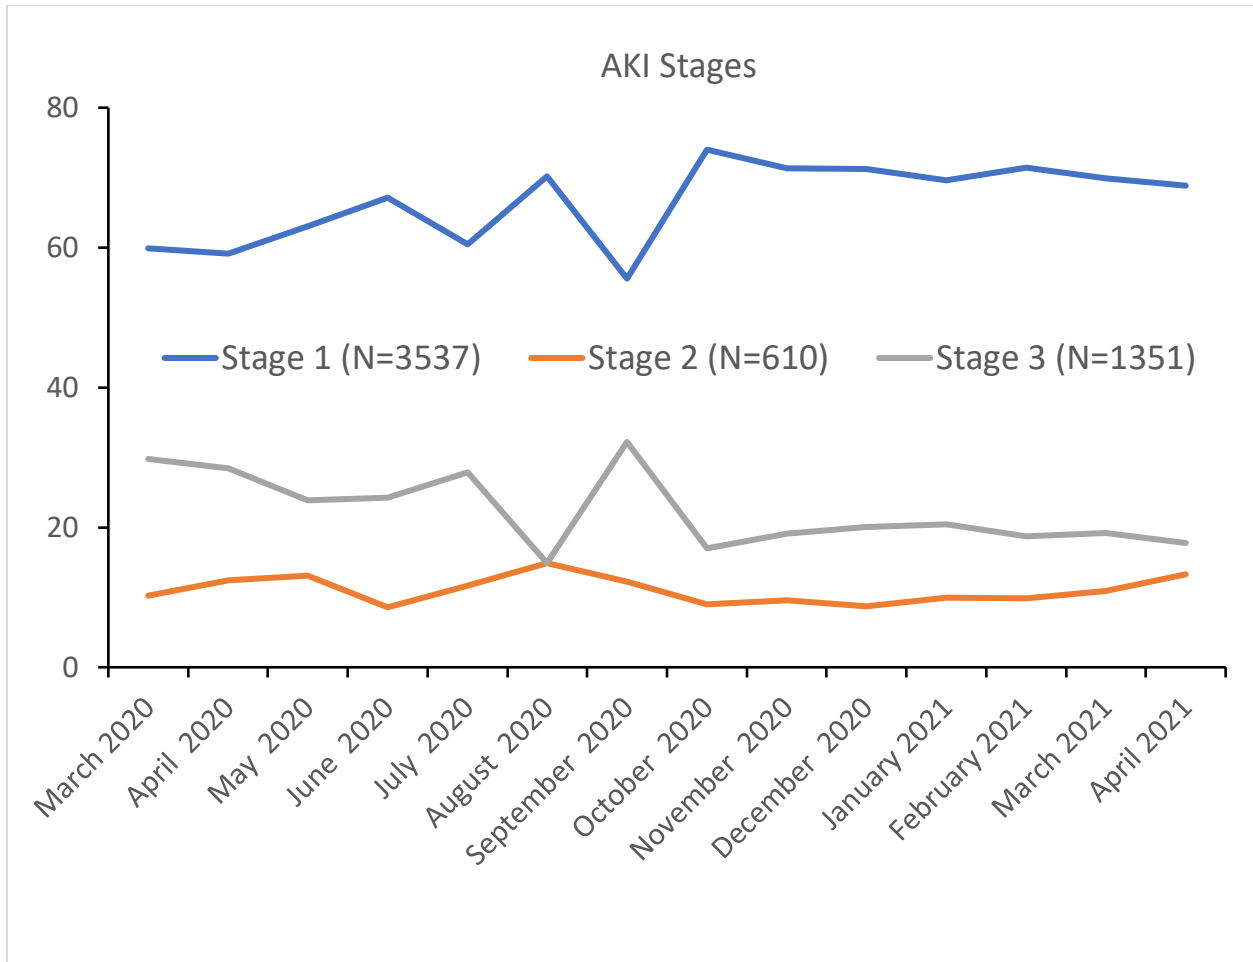

**Table S1.** Percentage of imputed creatinine values over time

| Month          | Imputed creatinine (N(%)) |
|----------------|---------------------------|
| March 2020     | 1152 (60.73)              |
| April 2020     | 2065 (63.56)              |
| May 2020       | 301 (55.13)               |
| June 2020      | 74 (42.29)                |
| July 2020      | 55 (43.65)                |
| August 2020    | 72 (56.69)                |
| September 2020 | 104 (53.33)               |
| October 2020   | 187 (67.75)               |
| November 2020  | 234 (62.9)                |
| December 2020  | 571 (60.62)               |
| January 2021   | 709 (59.48)               |
| February 2021  | 657 (60.44)               |
| March 2021     | 599 (60.02)               |
| April 2021     | 390 (63)                  |

**Table S2.** Demographic characteristics of studied individuals

| <b>Variable</b>                    | <b>Value</b>  |
|------------------------------------|---------------|
| Age (mean, std)                    | 70.08 (15.29) |
| eGFR from baseline Cr. (mean, std) | 67.65 (36.83) |
| CKD (n, %)                         | 303 (5.5%)    |
| Gender (n, %)                      |               |
| Male                               | 3156 (57.26%) |
| Female                             | 2356 (42.74%) |
| Race (n, %)                        |               |
| Other                              | 1913 (34.80%) |
| White                              | 1518 (27.62%) |
| Black                              | 1492 (27.14%) |
| Asian                              | 305 (5.55%)   |
| Unknown                            | 264 (4.80%)   |

Legend:

CKD: chronic kidney disease, cr: creatinine, eGFR: estimated glomerular filtration rate, Std: standard deviation
